# Supplementary material
Source: PubMed Central journal article supplement (PMC2923816)
Supplement: NIHMS204750-supplement-01.pdf [file NIHMS204750-supplement-01.pdf]

## Supplementary data

# Structure-activity relationship study of acridine analogs as haspin and DYRK2 kinase inhibitors

Gregory D. Cuny,<sup>\*a,b</sup> Maxime Robin,<sup>c</sup> Natalia P. Ulyanova,<sup>d</sup> Debasis Patnaik,<sup>d</sup> Valerie Pique,<sup>c</sup> Gilles Casano,<sup>c</sup> Ji-Feng Liu,<sup>e</sup> Xiangjie Lin,<sup>e</sup> Jun Xian,<sup>b</sup> Marcie Glicksman,<sup>a,b</sup> Ross L. Stein,<sup>a,b</sup> Jonathan M.G. Higgins,<sup>d</sup>

<sup>a</sup>Laboratory for Drug Discovery in Neurodegeneration and <sup>b</sup>Partners Center for Drug Discovery, Brigham & Women's Hospital and Harvard Medical School, 65 Landsdowne Street, Cambridge, MA 02139, USA

<sup>c</sup>Aix-Marseille Université, Institut des Sciences Moléculaires de Marseille, iSm2-UMR CNRS 6263, Centre Saint Jérôme, Service 552, 13397 Marseille Cedex 20, France

<sup>d</sup>Division of Rheumatology, Immunology and Allergy, Department of Medicine, Brigham & Women's Hospital and Harvard Medical School, Smith 538A, 1 Jimmy Fund Way, Boston, MA 02115, USA

<sup>e</sup>Aberjona Laboratories, Inc., 100 Cummings Center, Suite 242-F, Beverly, MA 01915, USA

## **Table of Contents**

|                                                                                 |             |
|---------------------------------------------------------------------------------|-------------|
| <b><i>In vitro</i> kinase inhibition assay profile (Table S1 and Figure S1)</b> | p. S2 – S10 |
| <b>TR-FRET haspin and DYRK2 inhibitor assays</b>                                | p. S11      |

### ***In vitro* kinase inhibition assay profile.**

Compound **1** was screened against a panel of 270 kinases at 10  $\mu$ M at Carna Biosciences (<http://www.carnabio.com/english/>). The percent inhibitions for each kinase are listed in Table S1 with those demonstrating > 90% inhibition highlighted in red. Also, an interaction map for **1** is shown in Figure S1. The kinase tree was generated using percent inhibition values versus controls and the 'TreeSpot' kinome data visualization tool available as a web-based application (<http://www.kinomescan.com/login.aspx>). Only kinases with percent control values < 30% are displayed. One kinase (PKCB2, an isoform of PKCB) that meets this criterion is not displayed in Figure S1. Although haspin was not available in the original profile, it was subsequently found to give 100% inhibition of haspin activity in the Carna Bioscience assay at 10  $\mu$ M and it has therefore been added to Figure S1 for comparison. The kinase dendrogram was adapted by KINOMEscan and is reproduced with permission from Science (<http://www.sciencemag.org/>) and Cell Signaling Technology, Inc. (<http://www.cellsignal.com/>).

**Table S1.**

| Kinase      | %          |
|-------------|------------|
|             | Inhibition |
|             | <b>1</b>   |
|             | 10 $\mu$ M |
| ABL         | 47         |
| ABL(T315I)  | 64         |
| ACK (TNK2)  | 37         |
| ALK         | 41         |
| ARG         | 26         |
| AXL         | 55         |
| BLK         | 72         |
| BMX         | 29         |
| BRK         | 33         |
| BTK         | 64         |
| CSK         | 57         |
| CTK         | 48         |
| DDR1        | 4          |
| DDR2        | 54         |
| EGFR        | 47         |
| EGFR(L858R) | 40         |
| EGFR(T790M) | 36         |
| EPHA1       | 64         |
| EPHA2       | 33         |
| EPHA3       | 0          |
| EPHA4       | 0          |
| EPHA5       | 30         |
| EPHA6       | 32         |
| EPHA7       | 28         |

|               |    |
|---------------|----|
| EPHA8         | 67 |
| EPHB1         | 0  |
| EPHB2         | 0  |
| EPHB3         | 32 |
| EPHB4         | 46 |
| FAK           | 26 |
| FER           | 34 |
| FES           | 11 |
| FGFR1         | 62 |
| FGFR2         | 43 |
| FGFR3         | 48 |
| FGFR3(K650E)  | 73 |
| FGFR3(K650M)  | 84 |
| FGFR4         | 71 |
| FGR           | 34 |
| FLT1          | 33 |
| FLT3          | 81 |
| FLT4          | 72 |
| FMS           | 37 |
| FRK           | 39 |
| FYN           | 51 |
| HCK           | 58 |
| HER2          | 9  |
| HER4          | 28 |
| IGF1R         | 39 |
| INSR          | 52 |
| IRR (INSRR)   | 47 |
| ITK           | 28 |
| JAK1          | 17 |
| JAK2          | 32 |
| JAK3          | 57 |
| KDR (VEGFR2)  | 37 |
| KIT           | 56 |
| KIT(T670I)    | 67 |
| KIT(V560G)    | 49 |
| LCK           | 45 |
| LTK           | 75 |
| LYNa          | 46 |
| LYNb          | 46 |
| MER           | 63 |
| MET           | 59 |
| MET(Y1235D)   | 75 |
| MUSK          | 32 |
| PDGFRa        | 81 |
| PDGFRa(T674I) | 80 |
| PDGFRb        | 56 |
| PYK2          | 46 |
| RET           | 51 |

|                |           |
|----------------|-----------|
| RON            | 65        |
| <b>ROS</b>     | <b>90</b> |
| SRC            | 26        |
| SRM            | 52        |
| SYK            | 48        |
| TEC            | 31        |
| TIE2           | 52        |
| TNK1           | 46        |
| TRKA           | 50        |
| <b>TRKB</b>    | <b>94</b> |
| TRKC           | 68        |
| TXK            | 32        |
| TYK2           | 28        |
| TYRO3          | 0         |
| YES            | 56        |
| ZAP70          | 65        |
| AKT1           | 31        |
| AKT2           | 37        |
| AKT3           | 26        |
| AMPKa1/b1/g1   | 56        |
| AMPKa2/b1/g1   | 41        |
| AurA           | 63        |
| AurB-INCENP    | 40        |
| AurC           | 43        |
| BMPR1A         | 56        |
| BRAF           | 8         |
| BRAF(V600E)    | 7         |
| BRSK1          | 22        |
| BRSK2          | 0         |
| CaMK1a         | 13        |
| CaMK1d         | 15        |
| CaMK2a         | 8         |
| CaMK2b         | 18        |
| CaMK2g         | 7         |
| CaMK2d         | 34        |
| CaMK4          | 14        |
| CDC2-CycB1     | 69        |
| CDC8-Dbf4      | 9         |
| CDK2-CycA      | 56        |
| CDK3-CycE1     | 55        |
| CDK4-CycD4     | 26        |
| CDK5-p25       | 61        |
| CDK6-CycD3     | 0         |
| CDK7-CycH-MAT1 | 45        |
| CDK9-CycT1     | 46        |
| CGK2 (PRKG2)   | 67        |
| CHK1           | 24        |
| CHK2           | 22        |

|                   |            |
|-------------------|------------|
| CK1a              | 16         |
| CK1d              | 34         |
| CK1e              | 62         |
| CK1g1             | 22         |
| CK1g2             | 28         |
| CK1g3             | 18         |
| CK2a1/b           | 49         |
| <b>CLK1</b>       | <b>98</b>  |
| CLK2              | 79         |
| CLK3              | 56         |
| COT (MAP3K8)      | 0          |
| CRIK              | 6          |
| DAPK1             | 29         |
| DCAMKL2           | 29         |
| DLK (MAP3K12)     | 18         |
| <b>DYRK1A</b>     | <b>94</b>  |
| DYRK1B            | 93         |
| <b>DYRK2</b>      | <b>100</b> |
| <b>DYRK3</b>      | <b>100</b> |
| EEF2K             | 28         |
| Erk1              | 51         |
| Erk2              | 43         |
| Erk5              | 61         |
| GSK3a             | 79         |
| GSK3b             | 65         |
| HGK (MAP4K4)      | 72         |
| <b>HIPK1</b>      | <b>92</b>  |
| <b>HIPK2</b>      | <b>85</b>  |
| HIPK3             | 90         |
| IKKa              | 7          |
| IKKb              | 75         |
| IKKe              | 1          |
| IRAK1             | 25         |
| IRAK4             | 2          |
| JNK1              | 27         |
| JNK2              | 20         |
| JNK3              | 32         |
| LIMK1             | 1          |
| LKB1-MO25a-STRADa | 0          |
| LOK               | 0          |
| MAP2K1            | 24         |
| MAP2K2            | 11         |
| MAP2K3            | 48         |
| MAP2K4            | 0          |
| MAP2K5            | 0          |
| MAP2K6            | 65         |
| MAP2K7            | 4          |
| MAP3K1            | 0          |

|                       |    |
|-----------------------|----|
| MAP3K2                | 0  |
| MAP3K3                | 10 |
| MAP3K4                | 0  |
| MAP3K5                | 7  |
| MAP4K2 (GCK)          | 55 |
| MAPKAPK2              | 71 |
| MAPKAPK3              | 61 |
| MAPKAPK5              | 59 |
| MARK1                 | 32 |
| MARK2                 | 25 |
| MARK3                 | 28 |
| MARK4                 | 36 |
| MELK                  | 84 |
| MGC42105 (NIM1)       | 25 |
| MINK                  | 36 |
| MLK1 (MAP3K9)         | 35 |
| MLK2 (MAP3K10)        | 66 |
| MLK3 (MAP3K11)        | 63 |
| MNK1                  | 43 |
| MNK2                  | 78 |
| MRCKa                 | 24 |
| MRCKb                 | 39 |
| MSK1 N-term (RPS6KA5) | 37 |
| MSK2 N-term (RPS6KA4) | 39 |
| MSSK1 (SRPK3)         | 53 |
| MST1                  | 37 |
| MST2                  | 5  |
| MST3                  | 35 |
| MST4                  | 41 |
| NDR1                  | 40 |
| NEK1                  | 59 |
| NEK2                  | 30 |
| NEK6                  | 63 |
| NEK7                  | 38 |
| NEK9                  | 50 |
| NuaK1                 | 0  |
| p38a                  | 56 |
| p38b                  | 46 |
| p38d                  | 14 |
| p38g                  | 24 |
| p70S6K (RPS6KB1)      | 70 |
| p70S6Kb (RPS6KB2)     | 78 |
| PAK1                  | 0  |
| PAK2                  | 0  |
| PAK3                  | 54 |
| PAK5 (PAK7)           | 34 |
| PAK6                  | 8  |
| PASK                  | 71 |

|                       |    |
|-----------------------|----|
| PBK                   | 63 |
| PDHK2                 | 26 |
| PDHK4                 | 14 |
| PDK1                  | 19 |
| PEK (EIF2AK3)         | 16 |
| PGK (PRKG1)           | 36 |
| PHKG1                 | 56 |
| PHKG2                 | 32 |
| PIM1                  | 95 |
| PIM2                  | 91 |
| PKACa (PRKACA)        | 74 |
| PKCa                  | 7  |
| PKCb1                 | 9  |
| PKCb2                 | 19 |
| PKCd                  | 28 |
| PKCe                  | 23 |
| PKCg                  | 25 |
| PKCh                  | 15 |
| PKCi                  | 42 |
| PKCq                  | 26 |
| PKCz                  | 55 |
| PKD1                  | 85 |
| PKD2                  | 87 |
| PKD3                  | 72 |
| PKN1                  | 34 |
| PKR (EIF2AK2)         | 15 |
| PLK1                  | 35 |
| PLK2                  | 10 |
| PLK3                  | 52 |
| PLK4                  | 50 |
| PRKX                  | 61 |
| RAF1                  | 15 |
| ROCK1                 | 6  |
| ROCK2                 | 12 |
| RSK1 N-term (RPS6KA1) | 67 |
| RSK2 N-term (RPS6KA3) | 74 |
| RSK3 N-term (RPS6KA2) | 58 |
| RSK4 N-term (RPS6KA6) | 74 |
| SGK                   | 77 |
| SGK2                  | 76 |
| SGK3                  | 76 |
| skMLCK                | 33 |
| SLK                   | 28 |
| SRPK1                 | 30 |
| SRPK2                 | 0  |
| TAK1-TAB1 (MAP3K7)    | 17 |
| TAOK2                 | 12 |
| TBK1                  | 32 |

|               |    |
|---------------|----|
| TSSK1         | 17 |
| TSSK2         | 60 |
| TTK (MPS1)    | 11 |
| WEE1          | 4  |
| WNK1          | 0  |
| PIK3CA/PIK3R1 | 38 |





## Percent Control

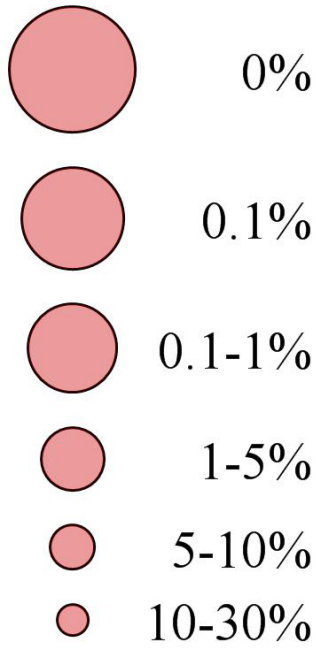

### **TR-FRET haspin assay**

Kinase reactions were performed in 50 mM Tris, pH 7.5, 5 mM MgCl<sub>2</sub>, 1 mM DTT, 0.01% Brij-35 using Proxiplate 384 Plus white assay plates (PerkinElmer). MBP-Haspin at 0.17 nM (0.05 nM enzyme final) and 0.33 μM biotinylated H3(1-21) peptide (0.1 μM peptide final, at the K<sub>m</sub>) in a volume of 3 μL kinase buffer were added to 2 μL solutions of compound. The kinase reaction was initiated by addition of 5 μL of 400 μM ATP per reaction (200 μM ATP final, near K<sub>m</sub>). The reaction was incubated for 10 minutes at room temperature. Reaction was terminated by addition of 10 μL 50 mM EDTA, 2 nM Europium labeled anti-Histone H3T3ph antibody, 40 nM Streptavidin-APC. After a two hour incubation at room temperature, TR-FRET measurements were performed using a PHERAstar HTS microplate reader (BMG Labtech, Offenberg, Germany), and were expressed as ratios of acceptor fluorescence at 665 nm over donor fluorescence at 620 nm.

### **DYRK2 inhibitor assay**

Test compounds in 2.5 μL (0.001-67 μM final concentration) were incubated in 25 μL in the presence of 50 mM Tris-HCl, pH 7.5, 5 mM MgCl<sub>2</sub>, 10 μM ATP (K<sub>M</sub> value), trace amounts of radioactively labeled γ<sup>33</sup>P-ATP (50 nM, PerkinElmer), 10 nM GST-DYRK2 enzyme (Carna Biosciences, Japan) and 150 μM biotin-Woodtide peptide substrate (biotin-KKISGRLSPIMTEQ-NH<sub>2</sub>, Abgent, at K<sub>M</sub> value) at room temperature. Reactions were stopped after 10 min by addition of 30 mM EDTA followed by spotting 10 μL of the reaction mix on to P81 phosphocellulose filter (Whatman). P81 filters were washed three times for 10 min in 0.75% phosphoric acid to remove free γ<sup>33</sup>P-ATP and then air-dried. γ<sup>33</sup>P-ATP incorporation was measured using a MicroBeta liquid scintillation counter (PerkinElmer). Background level of <sup>33</sup>P incorporation was defined from control reaction lacking peptide.
